# Supplementary material
Source: PubMed Central journal article supplement (PMC2049025)
Supplement: bj4070161add.pdf [file bj4070161add.pdf]

## Supplementary information

### Figure 1. Morphological alterations after knock down of TbVTC1 as detected by optical microscopy

Drastic alterations in cell morphology were noted beginning four days after tetracycline induction (**A**) and by day 8 anucleate (**B**, left panel), multinucleate (**B**, center panel), or multiflagellate (**B**, right panel) parasites were observed. Scale bars: 5  $\mu\text{m}$ .

### Figure 2. Morphological alterations after knock down of TbVTC1 as detected by scanning electron microscopy

**A-E**, Scanning electron microscopy of wild-type procyclic stages (**A**) or procyclic forms 4 days after induction with tetracycline (**B-E**). Note cells with the flagella detached from the cell body (**B**, **D**) and large cells (**C**, and **E**) as compared with cells of normal size. Scale bars, **A**: 3  $\mu\text{m}$ ; **B**: 8  $\mu\text{m}$ ; **C-D**: 6  $\mu\text{m}$ , **E**: 10  $\mu\text{m}$ .

### Figure 3. Effect of *TbVTC1* overexpression on procyclic forms growth

**A**, Western blot analysis showed that the overexpression of exogenous *TbVTC1* was efficiently induced 6 h after addition of tetracycline to procyclic forms transfected with a tetracycline-inducible *TbVTC1* expression construct. Each lane was loaded with 40  $\mu\text{g}$  protein of the whole cell lysates. Note that the exposure time was shorter than that used in Fig. 3A, upper panel, to avoid overexposure of lanes 6-48 hr. The blot was sequentially probed with antibody against TbVTC1 (upper panel) and monoclonal antibody against  $\alpha$ -tubulin as a loading control (lower panel), respectively. **B**, Cell growth was monitored in the presence (open squares) or absence (closed circles) of tetracycline.

### Figure 4. Partial sequence alignment of multiple Vtc homologues, demonstrating a conserved motif

The positions of the first amino acid in the selected fragments are indicated. Identical residues are shaded in red and highly conserved residues are shaded in green.

# Suppl. Figure 1

## A

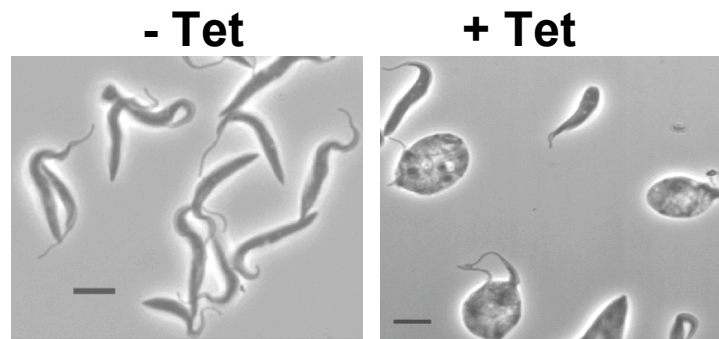

## B

Phase

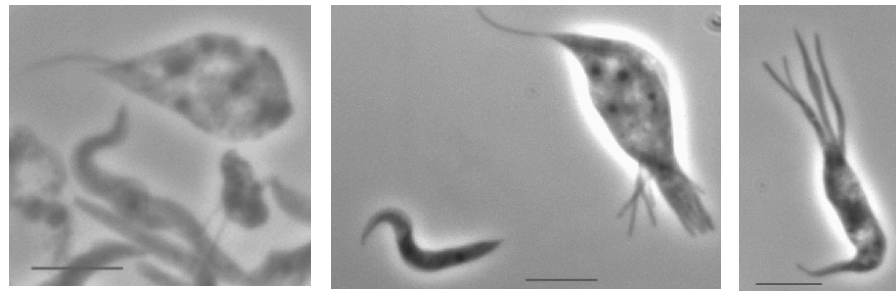

DAPI

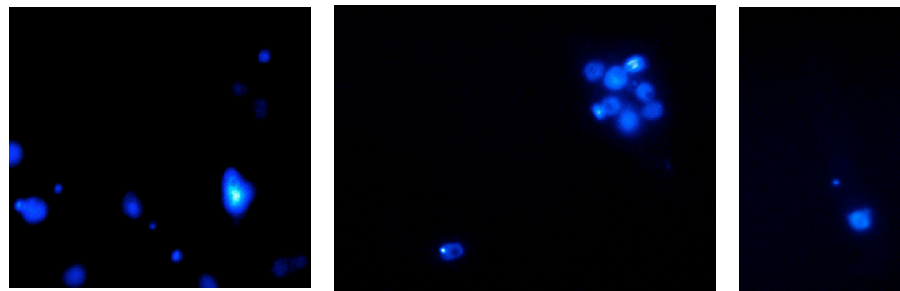

## Suppl. Figure 2

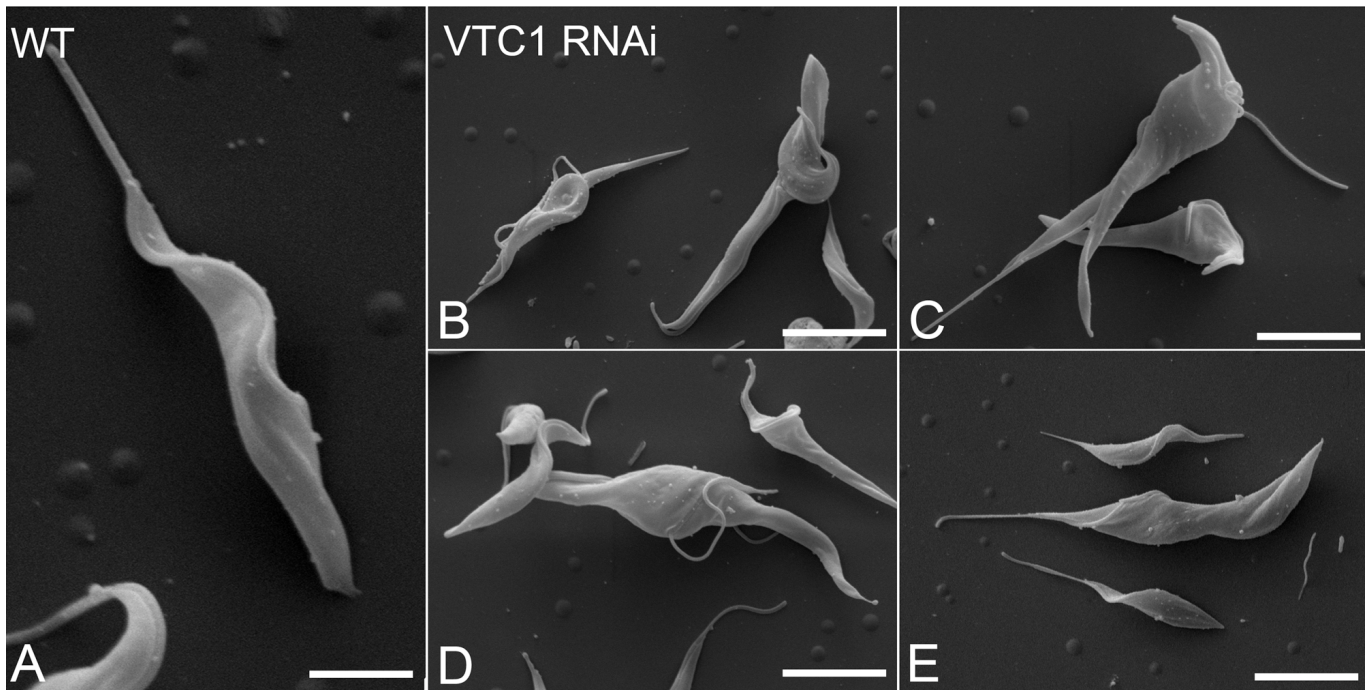

# Suppl. Figure 3

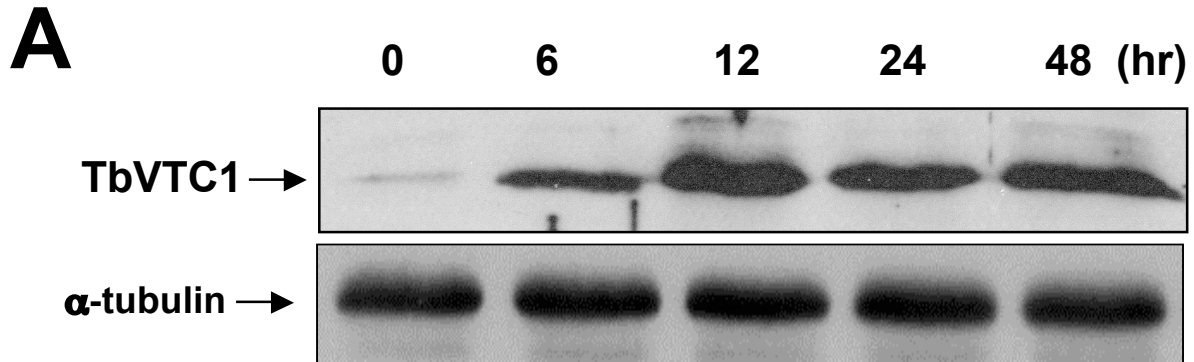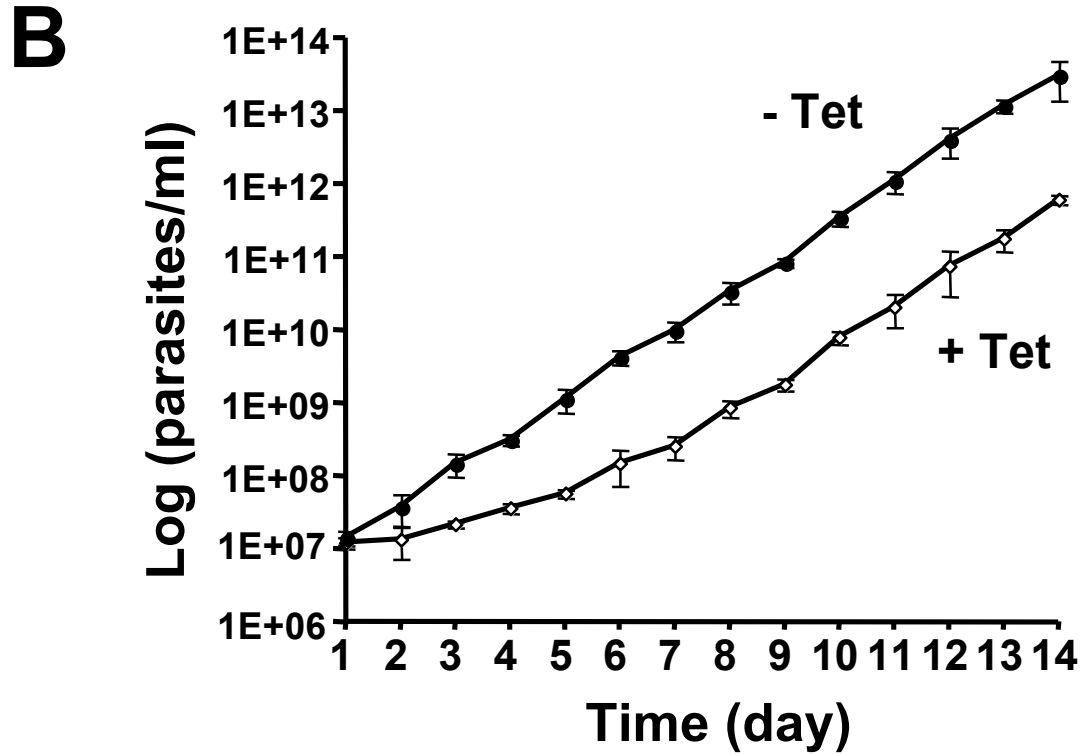

# Suppl. Figure 4

| VTC1 homologue                  | GI number | Position | Motif sequence                               |
|---------------------------------|-----------|----------|----------------------------------------------|
| <i>S. cerevisiae</i> long 1     | 14318518  | 678      | -GPVNV EAKVWLANERTFN RWLSVTSLSVITFSTIYNSVK-  |
| <i>S. cerevisiae</i> long 2     | 6325238   | 690      | -GPVKVEAKVWLANERTFN RWLSVTTLSVITFSTIYNSVQ-   |
| <i>S. cerevisiae</i> long 3     | 30267875  | 614      | -VPVRVEPKVYEATERTYLSWLSISILGGVSTTLLTYGS-     |
| <i>S. cerevisiae</i> short      | 731476    | 17       | -LPTRVEPKVEFANERTF LSWLNFTVMGGIGVGLLNFGD-    |
| <i>S. pombe</i> long 1          | 19115828  | 609      | -GPIKVEAKVWLANERTF LKWLHVVVLLGSAALYNSAG-     |
| <i>S. pombe</i> long 2          | 19075642  | 614      | -VPVRVEPKTYEALERTYLDYLRYSILMGSIGITLFSFAK-    |
| <i>S. pombe</i> short           | 15214176  | 17       | -LPVRVEPKVEFANERTF LSWLSFAVVLGGISVGLLNFGD-   |
| <i>C. albicans</i> long         | 46436767  | 669      | -GPIKIEPKVWLANERTFN RWLHVTTLSSTTFIIYSSTS-    |
| <i>E. cuniculi</i> long         | 19074392  | 502      | -IPVRVEPKVEFANERTF LSWVQFAIFLGGIGSALLGLGD-   |
| <i>C. hominis</i> long 1        | 54658378  | 880      | -SAVRVEPKTFEAFANERTLLQWMNMSVLLATTSVSLLSFGT-  |
| <i>C. hominis</i> long 2        | 54655502  | 443      | -KINKLDPKSLFAAERVMLYWRKTIYISTFVILLISKTK-     |
| <i>C. parvum</i> long           | 46227232  | 880      | -SAVRVEPKTFEAFANERTLLQWMNMSVLLATTSVSLLSFGT-  |
| <i>P. chabaudi</i> long         | 56525338  | 779      | -SVVRVEPKTFEAFANERTLLQWLNTSVLLSTTSITLLNFSN-  |
| <i>P. berghei</i> long          | 56495910  | 784      | -SVVRVEPKTFEAFANERTLLQWLNTSVLLSTTSITLLNFSN-  |
| <i>P. falciparum</i> long       | 23508985  | 945      | -AVVRVEPKTFEAFANERTLLQWLNTSVLLSTTSITLLNFSN-  |
| <i>T. gondii</i> long 1         | 37595440  | 106      | -PSVRVEPKTFEAFANERTLLQWMNTAVLLATTSITLLMNFNG- |
| <i>T. gondii</i> long 2         | 38231548  | 102      | -KMRKLDPKSEAFANERTFLQYLQKAVYLGSLATLLQWGG-    |
| <i>L. major</i> long            | 6165393   | 678      | -VPQKYDPKTLLTSERYMVKWMQLATSFGLLGIITSIIRFGK-  |
| <i>L. major</i> short           | 7532743   | 54       | -VPQKIDPKTFEAFANERTFLKWLISIVMTGLMSITLLNFGD-  |
| <i>T. cruzi</i> long            | 71659237  | 666      | -VPQKYDPKTLLTSERYMLKWT EHA TRGLVGLGVIQFGN-   |
| <i>T. cruzi</i> short           | 34558679  | 54       | -VPQKIDPKTFEAFANERTFLKWLISIVMTGLMSITLLNFGD-  |
| <i>T. brucei</i> long (TbVTC4)  | 74025436  | 659      | -VPQKYDPKTLLTSERFMVKWAEQATRVGVGLAVIRFGN-     |
| <i>T. brucei</i> short (TbVTC1) | 62176594  | 55       | -VPQKIDPKTFEAFANERTFLKWMISIVMTGLMSITLLNFGD-  |
